# Supplementary material
Source: publisher site journal article supplement (https://www.dovepress.com/get_supplementary_file.php?f=348380.docx)
Supplement: Supplementary file 1 [file get_supplementary_file.php]

**Folate Decorated Multifunctional Biodegradable Nanoparticles for Gastric Carcinoma Active Targeting Theranostics**

Xin Zhang, *, 1 Ronglin Yan, *, 1 Ziran Wei, *, 1 Dejun Yang, 1 Zunqi Hu, 1 Yu Zhang, 1 Xin Huang, 1 Hejing Huang, †, 2 Weijun Wang †, 1

1Department of Gastrointestinal Surgery, Second Affiliated Hospital of Naval Medical University, Shanghai, 200003, China

2Department of ultrasound, Second Affiliated Hospital of Naval Medical University, Shanghai, 200003, China

†Corresponding author：

E-mail: wangweijun@smmu.edu.cn, Tel: +86-021-81885601

E-mail: huanghejinga@163.com, Tel: +86- 021-81886051

**Experiment**

**Statistical analysis**

All data were presented as the mean ± standard deviation (SD). One-way analysis of variance (ANOVA) was used to assess significance between groups, after which post-hoc tests with the Bonferroni correction were used for comparison among individual groups. *p < 0.05 was considered significant, and **p < 0.01 and ***p < 0.001 were considered highly significant.


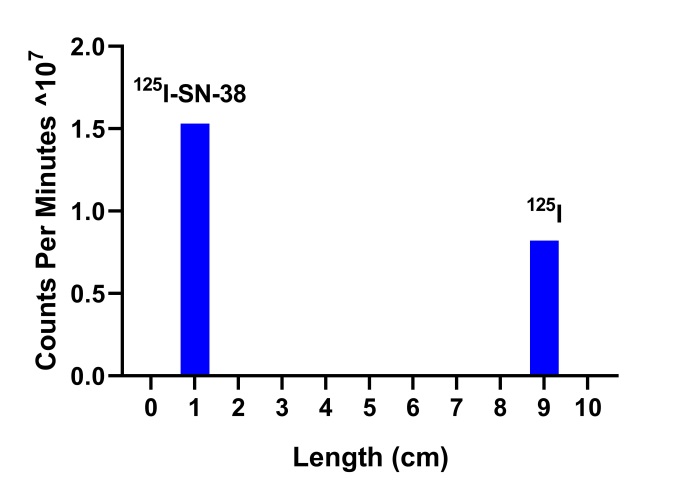


Figure S1. Thin layer chromatography analysis of 125I-SN-38. The Rf of 125I-SN-38 was ~0.1, and free 125I was ~0.9.


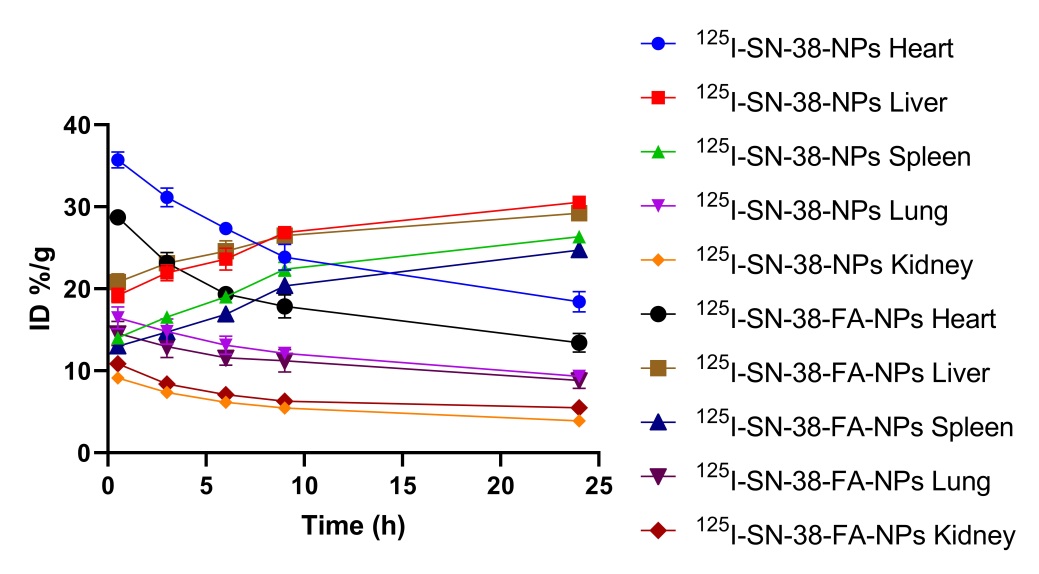


Figure S2. Quantification of distribution of major organs was obtained from SPECT images varied with postinjection time.


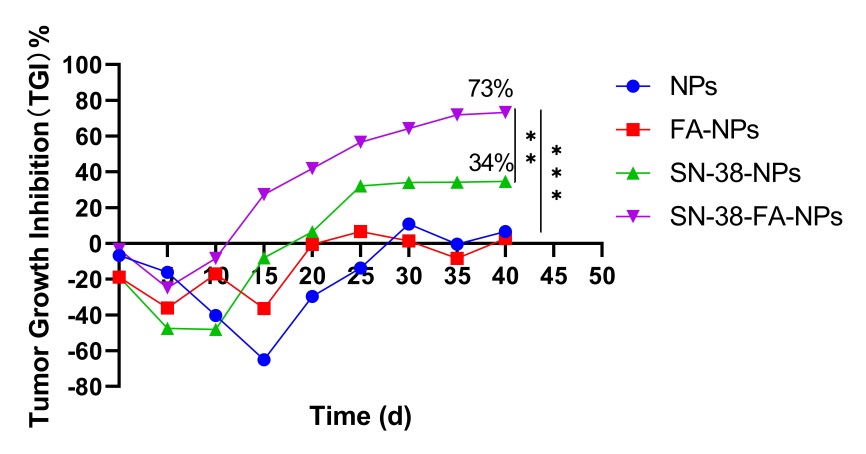


Figure S3. The tumor growth inhibition of NPs, FA-NPs, SN-38-NPs, and SN-38-FA-NPs was calculated over time. **p < 0.01 and ***p < 0.001 considered highly significant.
